# Supplementary material
Source: publisher figshare collection journal article supplement (https://frontiersin.figshare.com/ndownloader/files/23380112)
Supplement: Supplementary file 1 [file 23380112]

## *Supplementary Material*

### 1 Supplementary Figures

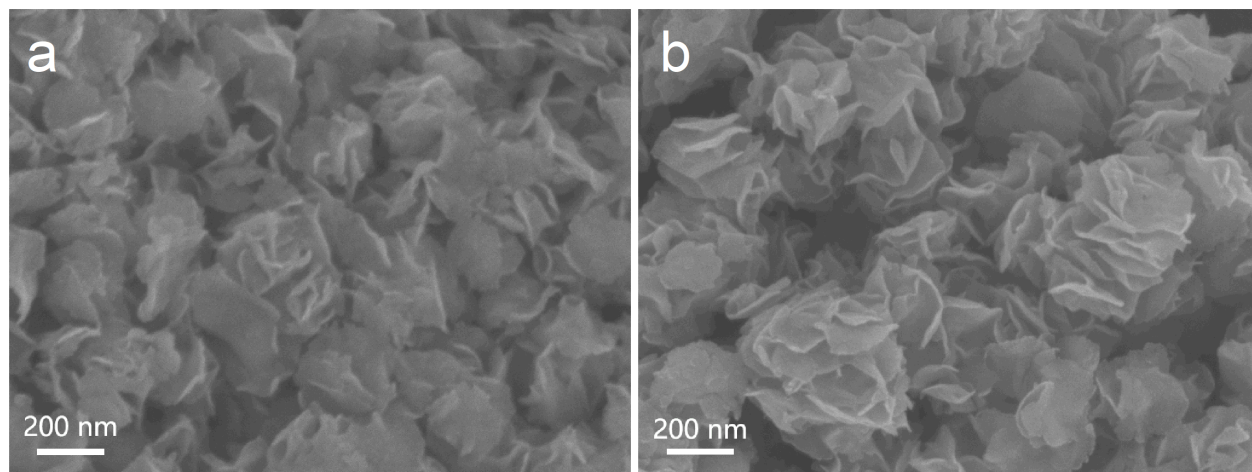

**Figure S1.** SEM image of MoS<sub>2</sub> (a) and MoS<sub>2-x</sub> (b).

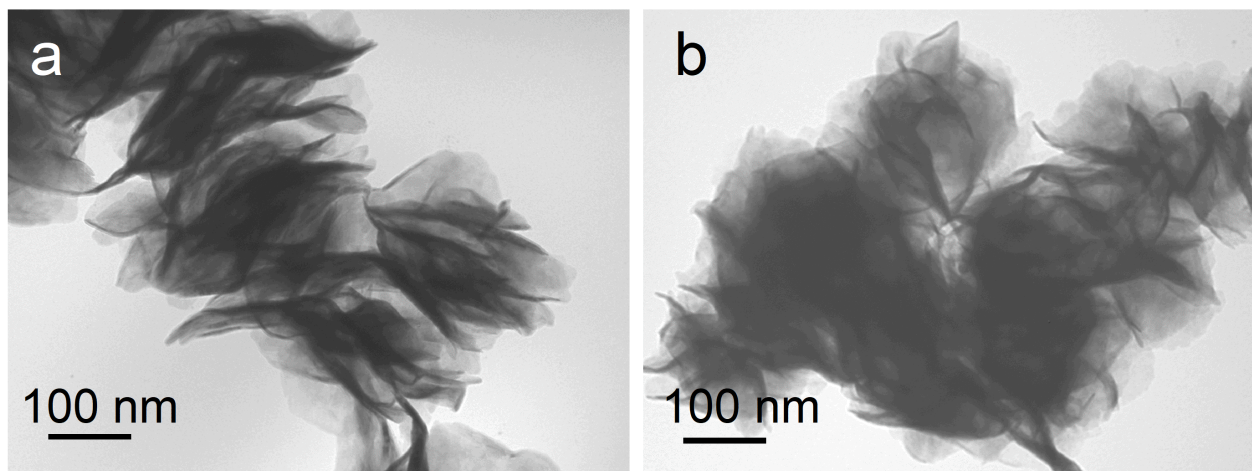

**Figure S2.** TEM image of MoS<sub>2</sub> (a) and MoS<sub>2-x</sub> (b).

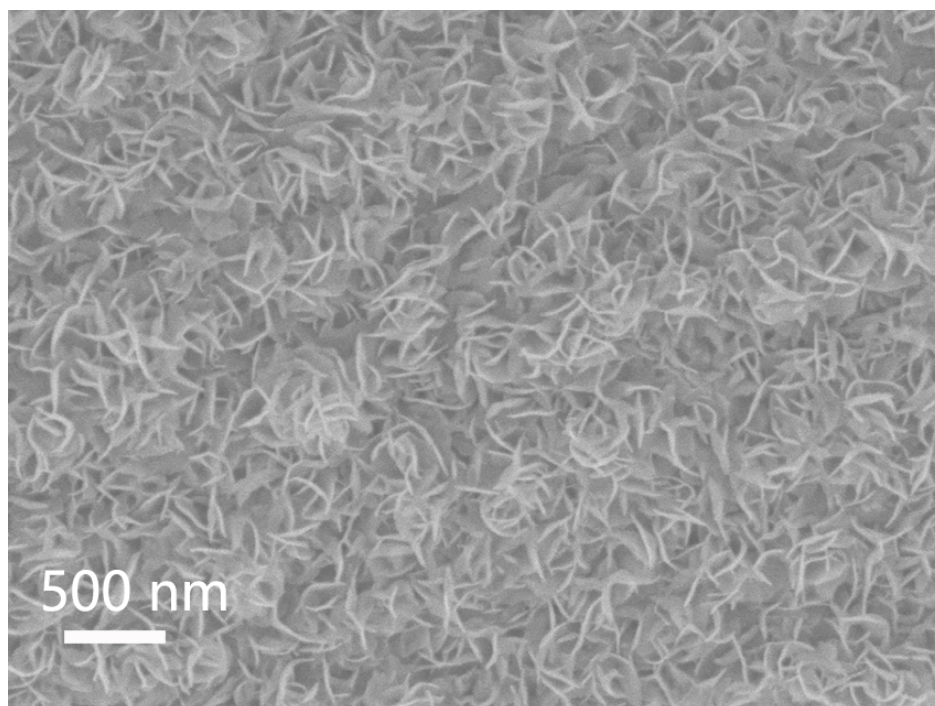

**Figure S3.** Enlarged SEM image of MoS<sub>2-x</sub>.

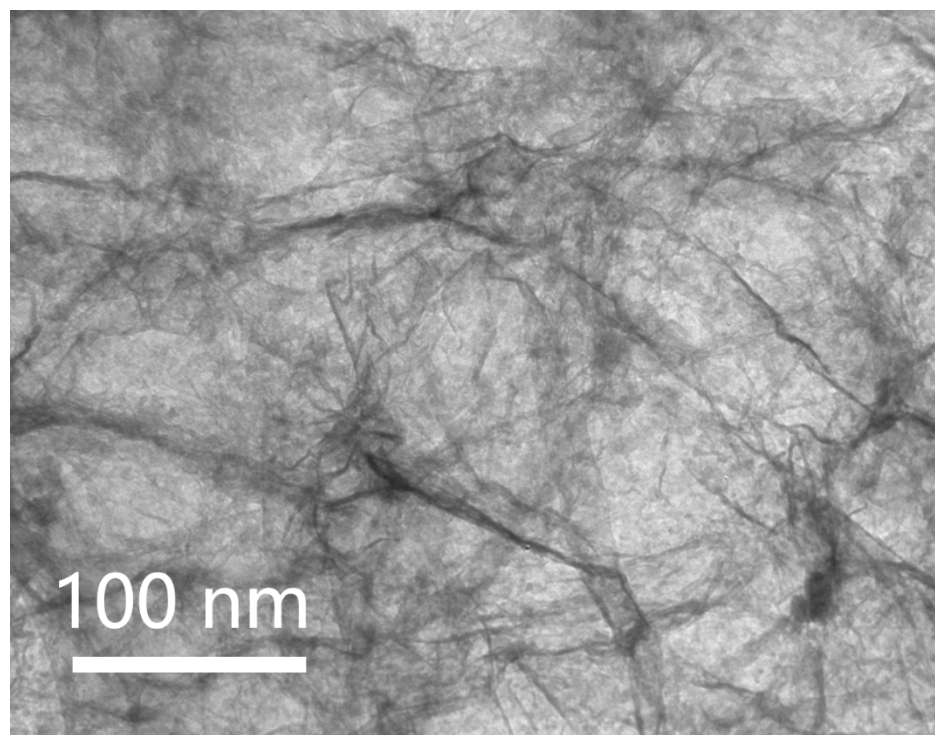

**Figure S4.** Enlarged TEM image of MoS<sub>2-x</sub>.

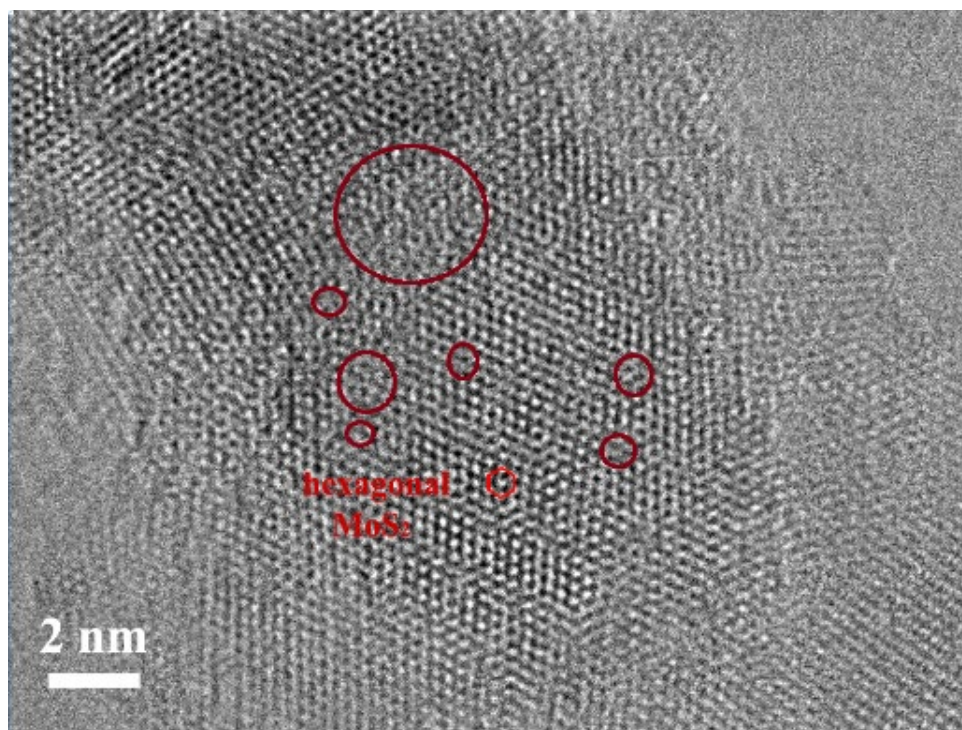

**Figure S5.** HRTEM image of hexagonal  $\text{MoS}_{2-x}$  basal plane.

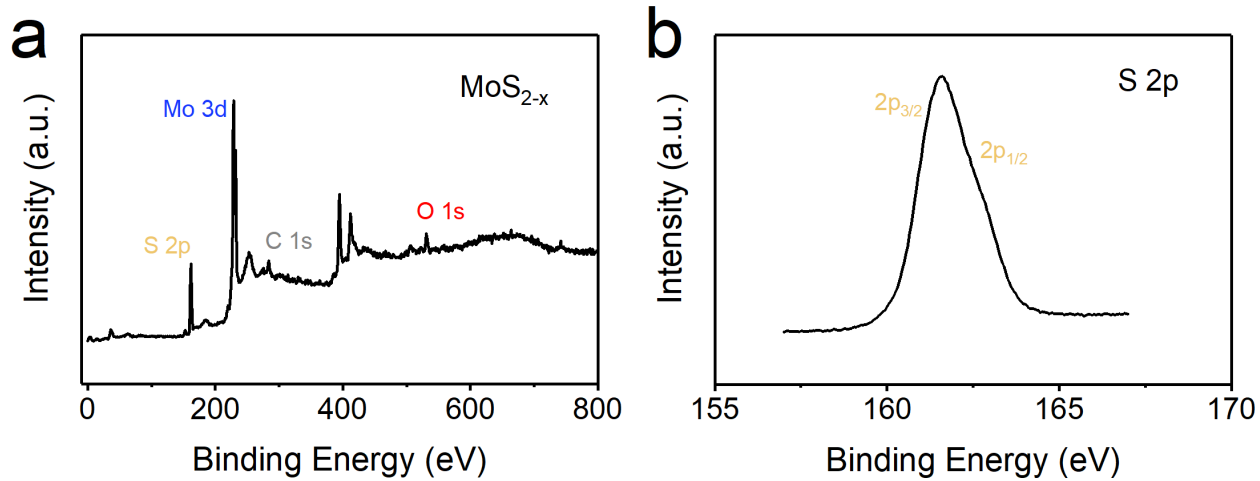

**Figure S6.** XPS survey scan (a) and S 2p spectra (b) of  $\text{MoS}_{2-x}$ .



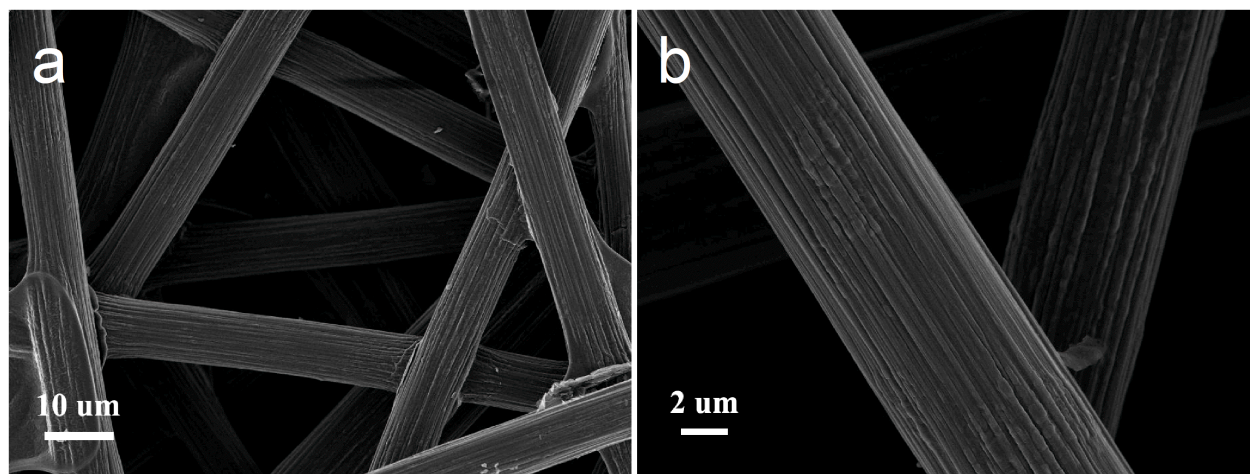

**Figure S7.** SEM image of carbon paper (a) and enlarged view (b).

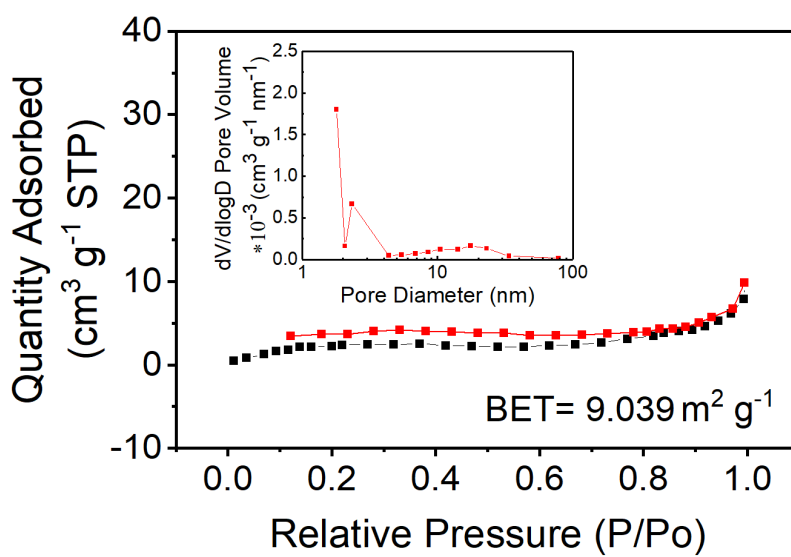

**Figure S8.** Nitrogen adsorption and desorption isotherms and pore-size distribution (insert) of carbon paper.

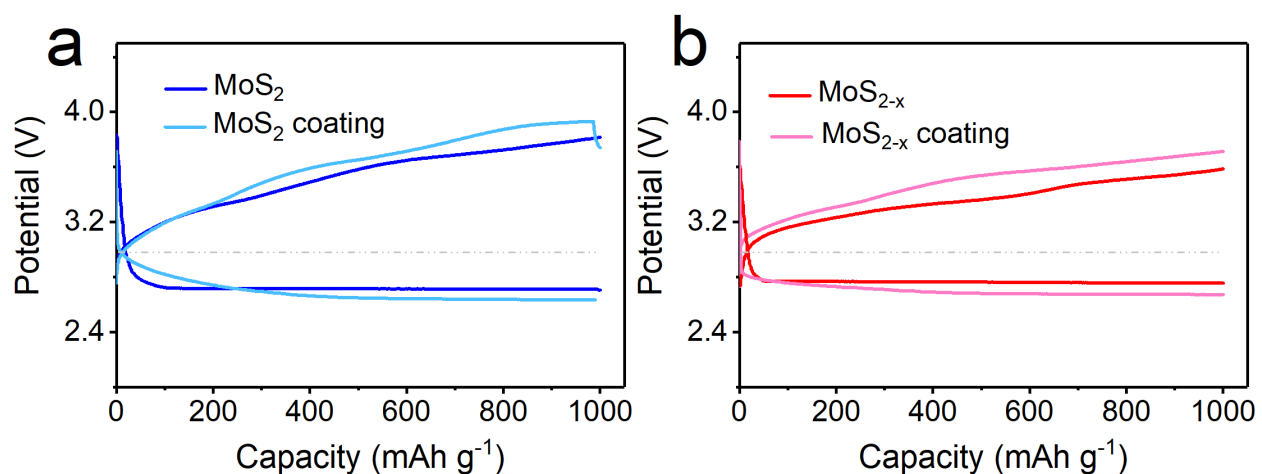

**Figure S9.** Galvanostatic discharge and charge profiles of MoS<sub>2</sub> and MoS<sub>2</sub> coating (a) and MoS<sub>2-x</sub> coating (b) at the current of 500 mA g<sup>-1</sup> with the capacity cutoff of 1000 mA h g<sup>-1</sup>.

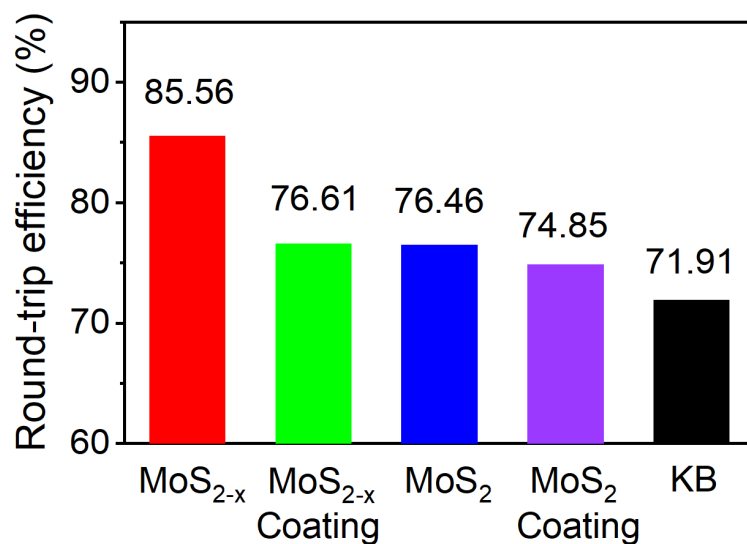

**Figure S10.** Round-trip efficiency of MoS<sub>2-x</sub> (growing), MoS<sub>2-x</sub> (coating), MoS<sub>2</sub> (growing), MoS<sub>2</sub> (coating) and Kejen Black (coating) on carbon paper.

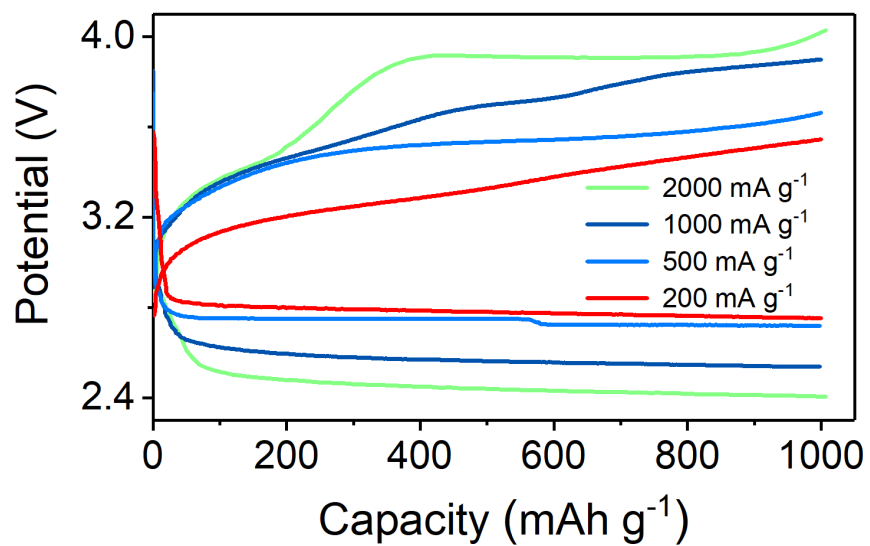

**Figure S11.** The rate performance of Li-O<sub>2</sub> battery with MoS<sub>2-x</sub> cathode under current density varying from 200 mA g<sup>-1</sup> to 2000 mA g<sup>-1</sup>.

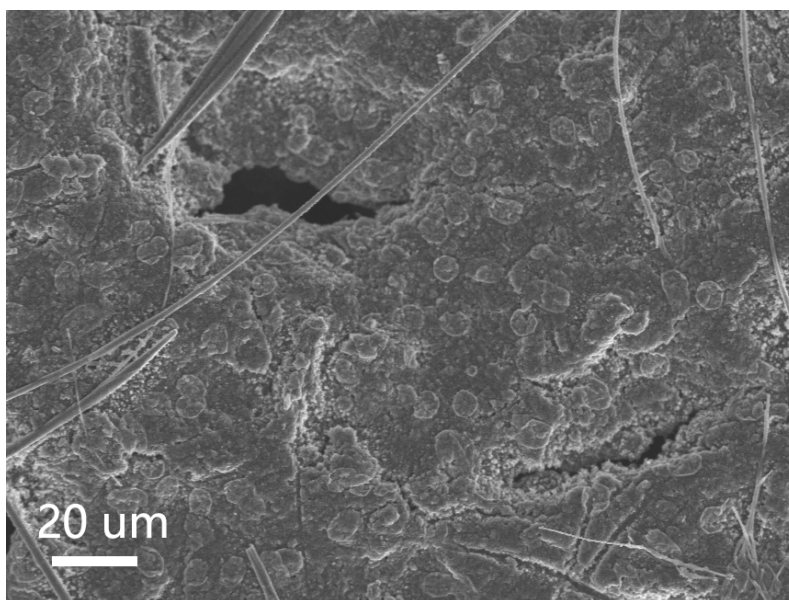

**Figure S12.** SEM image of MoS<sub>2</sub> cathode after discharge to 1000 mA h g<sup>-1</sup>.
